# Supplementary material for: Cholesterol overload in the liver aggravates oxidative stress-mediated DNA damage and accelerates hepatocarcinogenesis
Source: PubMed Central journal article supplement (PMC5732793; doi:10.18632/oncotarget.22024), 2017-10-24
Supplement: oncotarget-08-104136-s001.pdf [file oncotarget-08-104136-s001.pdf]

## Cholesterol overload in the liver aggravates oxidative stress-mediated DNA damage and accelerates hepatocarcinogenesis

### SUPPLEMENTARY MATERIALS

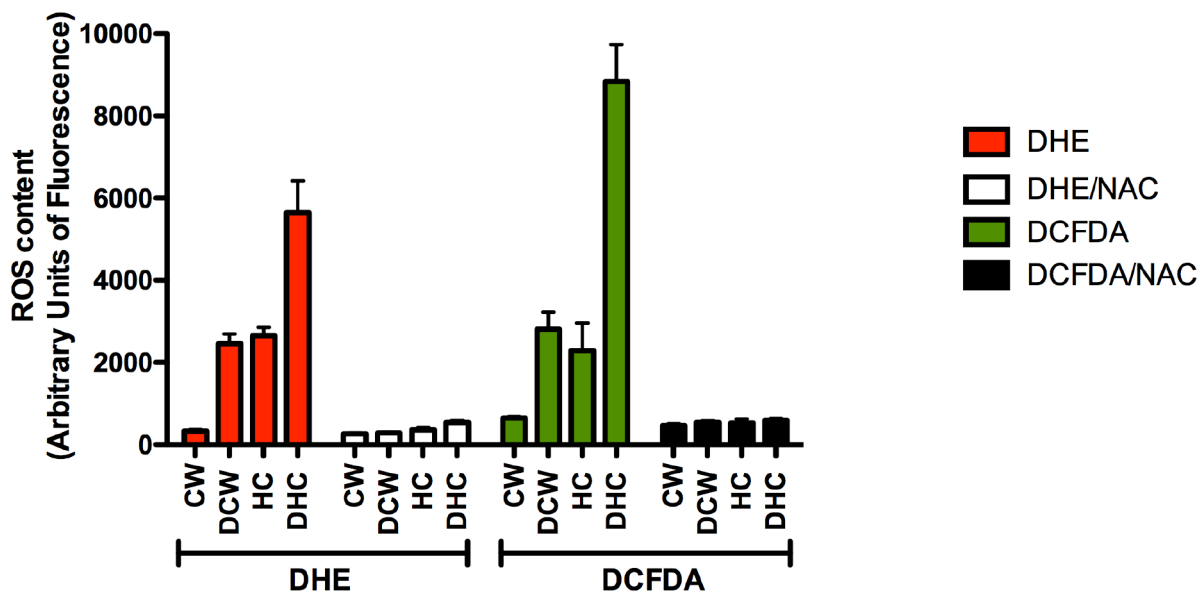

**Supplementary Figure 1: Reactive oxygen species quantification in liver tissue.** ROS determine at day 7 by dihydroethidium (DHE, 5  $\mu$ M) and 2',7'-dichlorofluorescein diacetate (DCFDA, 5  $\mu$ M) in presence or absent of NAC. Each column represents the mean  $\pm$  SEM in at least four different mice.

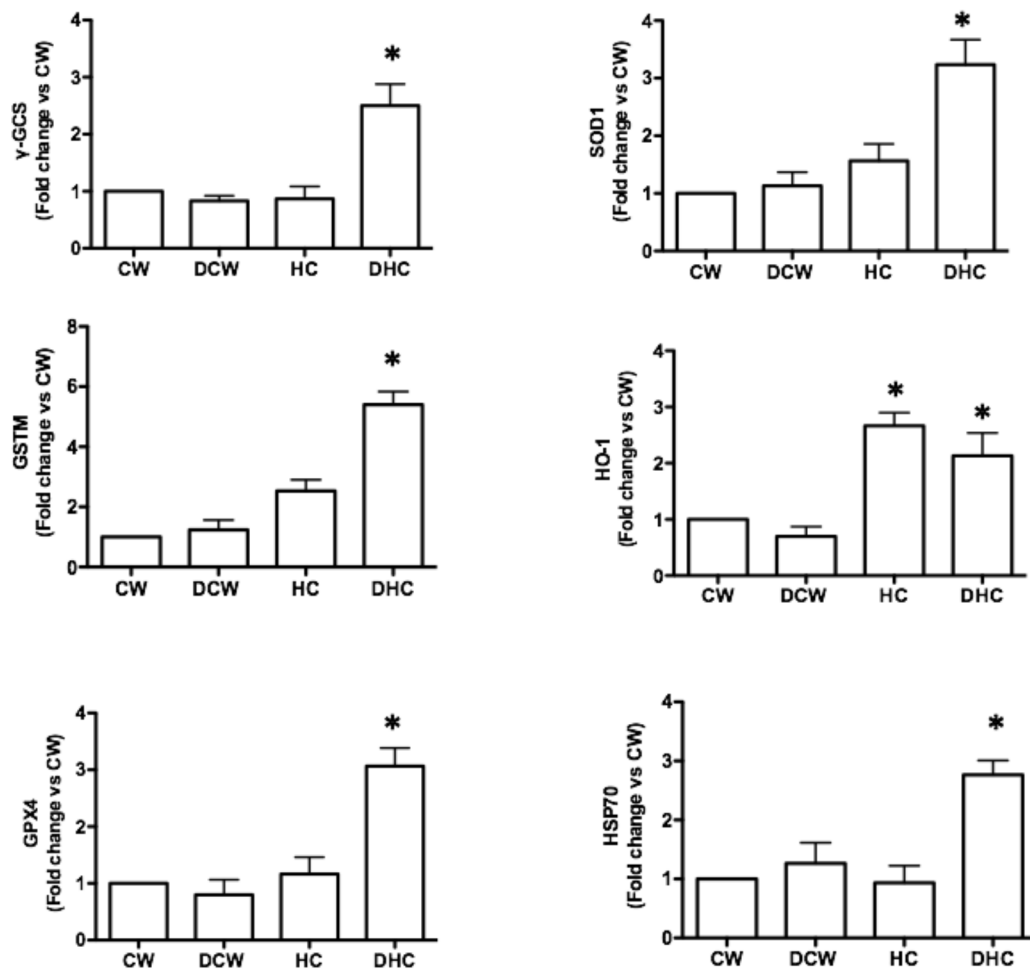

**Supplementary Figure 2: Densitometric analysis of antioxidant and protective proteins.** Each column represents the mean  $\pm$  SEM in at least four different mice. \*,  $p \leq 0.05$  vs Chow fed animals (CW).

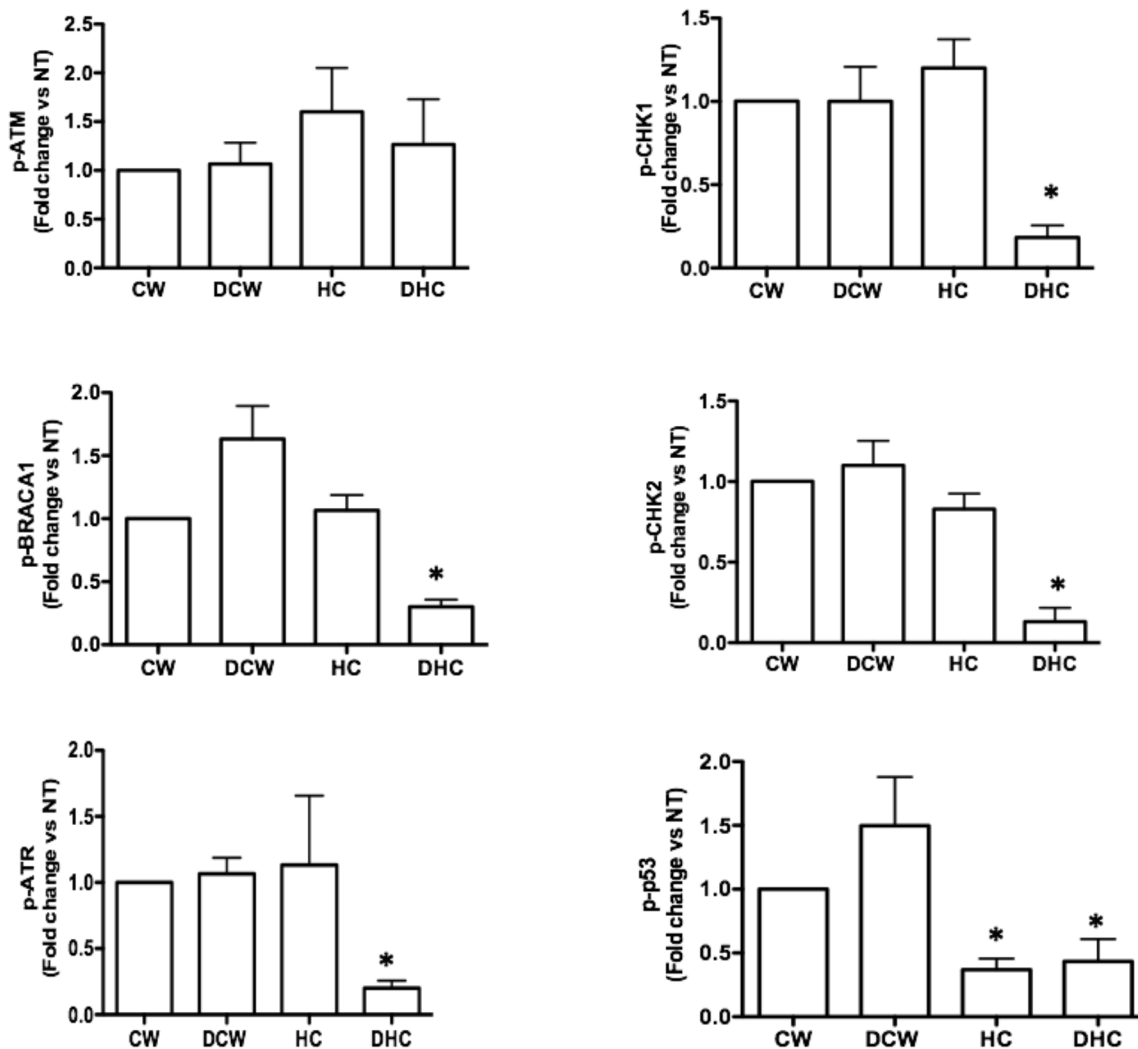

**Supplementary Figure 3: Densitometric analysis of DNA repair-related enzymes.** Each column represents the mean ± SEM in at least four different mice. \*,  $p \leq 0.05$  vs Chow fed animals (CW).

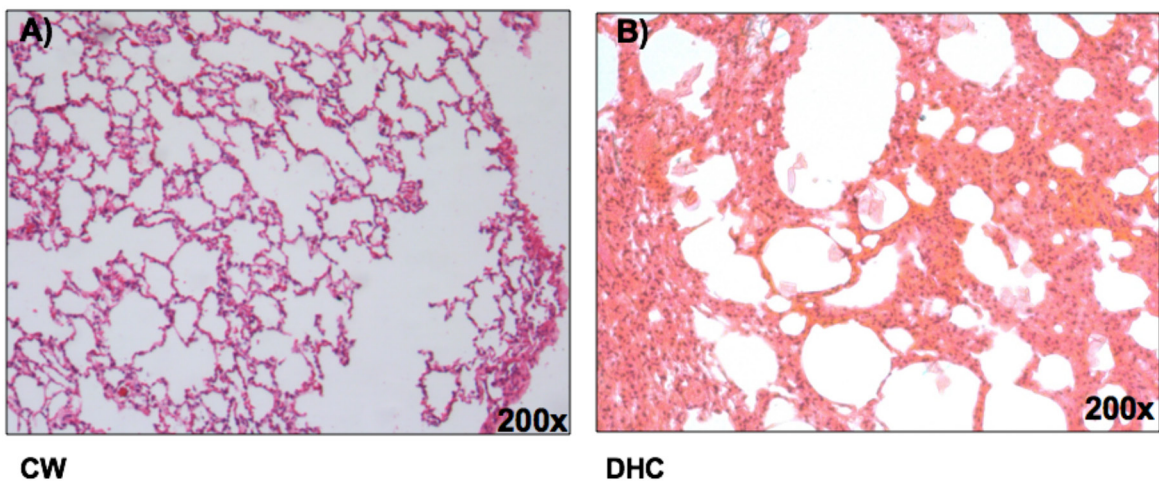

**Supplementary Figure 4: DEN treatment induces lung metastasis under HC diet at month 8.** Histology analysis by H&E routine staining of lungs from (A) Control Chow (CW) animals; (B) DEN treated mice under high cholesterol (HC) diet exhibiting the metastasis.

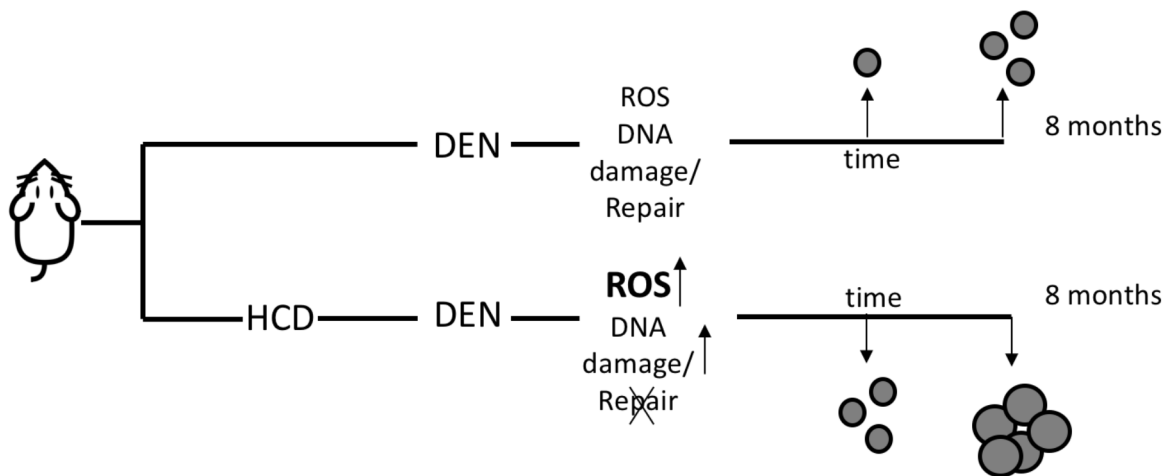

**Supplementary Figure 5: Graphical overview of main findings.** Cholesterol overload in the liver accelerates the carcinogenic process induced by DEN, increasing ROS content and impairing DNA repair machinery, generating tumors at early times and increased in size comparing with animals under normal diet. HCD, high cholesterol diet; DEN, N-diethylnitrosamine; ROS, reactive oxygen species.

Supplementary Table 1: Antibodies used in the study

| Antibody                 | Company        | Catalog number | dilution |
|--------------------------|----------------|----------------|----------|
| Actin                    | Sigma          | A2228          | 1:1000   |
| Bax                      | Santa Cruz     | 6236           | 1:200    |
| Bcl-2                    | Santa Cruz     | 783            | 1:200    |
| GPX4                     | Abcam          | 41787          | 1:1000   |
| GSTm                     | Santa Cruz     | FL-218         | 1:200    |
| HO-1                     | Santa Cruz     | 5141S          | 1:200    |
| HSP70                    | Santa Cruz     | 1060           | 1:200    |
| p-ATM (Ser1981)          | Cell Signaling | 5883           | 1:1000   |
| p-ATR (Ser428)           | Cell Signaling | 2853           | 1:1000   |
| p-BRCA1(Ser1524)         | Cell Signaling | 9009           | 1:1000   |
| p-CHK1(Ser345)           | Cell Signaling | 2348           | 1:1000   |
| p-CHK2 (Thr68)           | Cell Signaling | 2197           | 1:1000   |
| p-ERK1/2 (Thr202/Tyr204) | Cell Signaling | 9101           | 1:1000   |
| p-H2AX (Ser139)          | Cell Signaling | 9718           | 1:1000   |
| p-p53 (Ser15)            | Cell Signaling | 9286           | 1:1000   |
| gamma-GCS                | Santa Cruz     | 22755          | 1:200    |
